# Supplementary material for: Conversion of a Bi–Sn complex to Bi nanoparticles for the enhancement of V(ii)/V(iii) redox kinetics
Source: Royal Society of Chemistry journal article supplement (doi:10.1039/d0ta03732j), 2020-01-01
Supplement: d0ta03732j1.pdf [file d0ta03732j1.pdf]

**SUPPORTING INFORMATION:**

**Conversion of Bi-Sn Complex to Bi Nanoparticles**

**for the Catalysis of V(II)/V(III) Kinetics**

Abhinandh Sankar<sup>†,a</sup>, Kapila Gunasekera<sup>‡,b</sup>, Zhipeng Nan<sup>†,c</sup>, Aaron Welton<sup>‡</sup>, Junchuan Fang<sup>†</sup>,  
Kevin Tonnis<sup>†</sup>, Rickey Terrell<sup>†</sup>, Punit Boolchand<sup>‡</sup>, and Anastasios P. Angelopoulos<sup>\*,†</sup>

<sup>†</sup>Department of Chemical and Environmental Engineering, University of Cincinnati, Cincinnati,  
OH 45221, USA.

<sup>‡</sup>Department of Electrical and Computer Engineering, University of Cincinnati, Cincinnati, OH  
45221, USA.

Present Addresses: <sup>a</sup>Interplastic, OH, <sup>b</sup>IM Flash, Lehi, UT, <sup>c</sup>Storagenergy Technologies, UT

<sup>\*</sup>Corresponding Author: [angeloas@ucmail.uc.edu](mailto:angeloas@ucmail.uc.edu)

Figure S1: <sup>119</sup>Sn Mössbauer Spectroscopy of the synthesis suspension at various time intervals: (a) 0 minutes, (b) 60 minutes, (c) 12 hours, (d) 24 hours, (e) 48 hours, (f) 3 days, (g) 5 days, (h) 13 days. The solid black line indicates the measured spectra while the deconvoluted spectra for the various Sn moieties are shown in color: blue for moiety A, green for moiety C, and red for moiety B, as identified in Figure 2 of the article.

Figure S2: XANES BiL<sub>2</sub> spectra of synthesis suspension in red at various times as indicated: time 0 (dashed line), 1 hour (dotted line), 14 days (solid line). Reference powder spectra are in black as indicated: Bi<sub>2</sub>O<sub>3</sub> (dashed line), BiCl<sub>3</sub> (dotted line), Bi metal (solid line).

Figure S3: XRD pattern of BiNP in Figure 4 (c). Peak assignments are shown according to the rhombohedral structure of Bi metal. The asterix indicate the positions of much smaller BiO<sub>x</sub> peaks while the squares indicate peaks associated with the aluminum holder.

Figure S4: (a) Magnified SEM image of a typical Bi cluster observed with 4 layers. (b) Magnified SEM image of a white cluster formed on the 20 layer sample in Figure 5(d). The cluster area contains more than 6 times the amount of Bi as the interstitial space (as determined using EDS).

Figure S5: EDS k-ratio for Bi ( $I_{\text{coating}}/I_{\text{Bi metal}}$ ) with respect to the number of deposited layers.

Figure S6: X-ray photoelectron spectrum of the C1s binding energy region for the dried GNP (solid) and mixed BiNP-GNP (dashed) suspensions. Counts for each curve are normalized to the most prominent adventitious (C-C) carbon peak at 284.8 eV. A secondary peak appears at ~289 eV indicating the presence of an oxidized surface species (C-O).

Figure S7: (a) SEM image showing an 8 LbL layer deposit of BiNP on GC recorded at 1000x magnification. (b) Magnified SEM image of typical Bi clusters.

Figure S8: X-ray photoelectron spectrum of the Bi<sub>4f</sub> binding energy region of the BiNP assembly. No metallic Bi is observed.

Figure S9: LSV showing the impact of repeated potential sweeps in 0.5 M H<sub>2</sub>SO<sub>4</sub> on Bi peak intensity for a 4 layer mixed BiNP-GNP assembly (a) when no NaOH wash is employed (the inset expands the potential region where Sn removal occurs) and (b) after 1 min wash in 0.25 M NaOH. Scan rate of 50 mV s<sup>-1</sup>.

Figure S10. The initial, 50<sup>th</sup>, and 100<sup>th</sup> consecutive CV's of 8 layers of BiNP-GNP deposited on a GC electrode in 2 M H<sub>2</sub>SO<sub>4</sub>. The sweep rate was 20 mV s<sup>-1</sup>.

Figure S11. LSV in the Bi stripping region of the samples subjected to CV cycling as in Figure S6. Normalized current density depicts relative loss in Bi content.

Figure S12: LSV showing the impact of repeated potential sweeps in 0.5 M H<sub>2</sub>SO<sub>4</sub> on Bi peak intensity for an 8 layer BiNP assembly after 1 min wash in 0.25 M NaOH. Scan rate of 50 mV s<sup>-1</sup>.

Figure S13: RDE voltammograms of (a) 4, 8, and 20 layer assemblies of mixed BiNP-GNP at 750 rpm in N<sub>2</sub>-saturated 0.1M V(III) + 2M H<sub>2</sub>SO<sub>4</sub> solution, (b) 8 assembled layers of pure GNP at different rotation speeds ranging from 200 rpm to 2000 rpm in 0.1M V(III) + 2M H<sub>2</sub>SO<sub>4</sub> electrolyte conditions, and (c) as in (b) but utilizing 8 assembled layers of mixed BiNP-GNP. Inset plot in (c) illustrates Levich behavior.

Figure S14: (a) Koutecky-Levich plots obtained from hydrodynamic voltammograms for 4,8, and 20 layers of mixed BiNP-GNP at -0.70 V (vs Ag/AgCl), (b) comparison of K-L analysis for 8 assembled layers with Bi (at -0.70 V vs. Ag/AgCl) and without Bi (at -0.85 V vs Ag/AgCl), as labeled, and (c) K-L plots of 8 layers of mixed BiNP-GNP obtained at different potentials. All in in N<sub>2</sub>-saturated 0.1M V(III) + 2M H<sub>2</sub>SO<sub>4</sub> solution.

Table S1: Elemental Data of BiNP from EDS

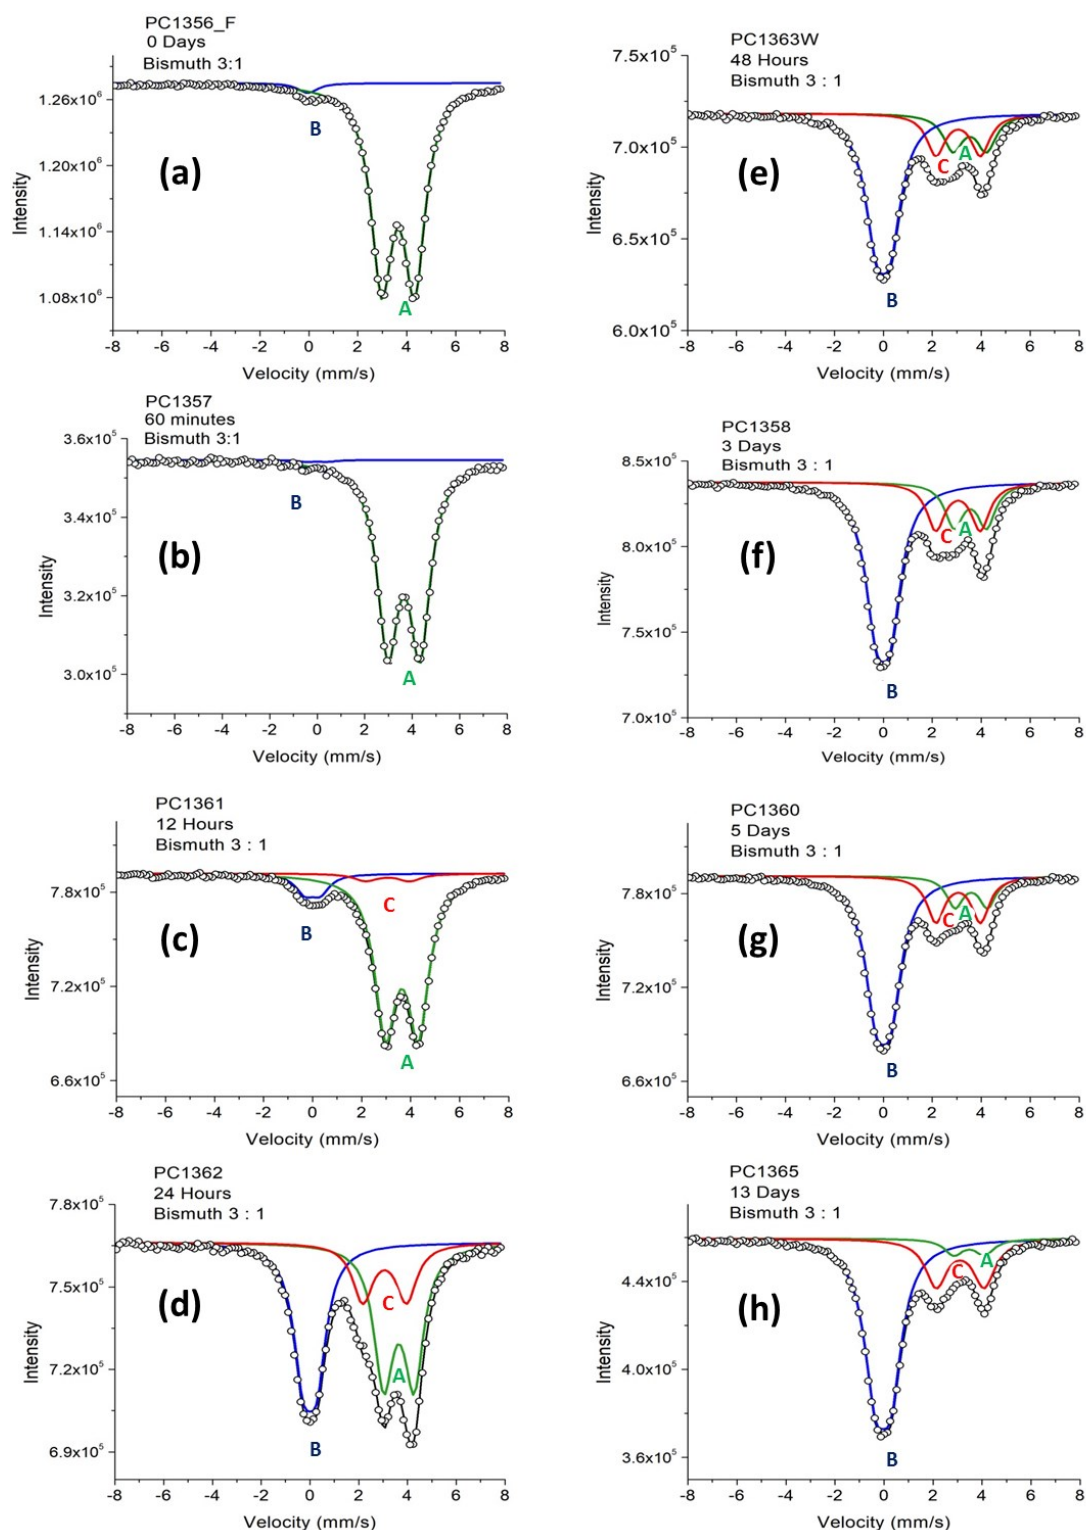

Figure S1.  $^{119}\text{Sn}$  Mössbauer Spectroscopy of the synthesis suspension at various time intervals: (a) 0 minutes, (b) 60 minutes, (c) 12 hours, (d) 24 hours, (e) 48 hours, (f) 3 days, (g) 5 days, (h) 13 days. The solid black line indicates the measured spectra while the deconvoluted spectra for the various Sn moieties are shown in color: green for moiety A, blue for moiety B, and red for moiety C, as identified in Figure 2 of the article.

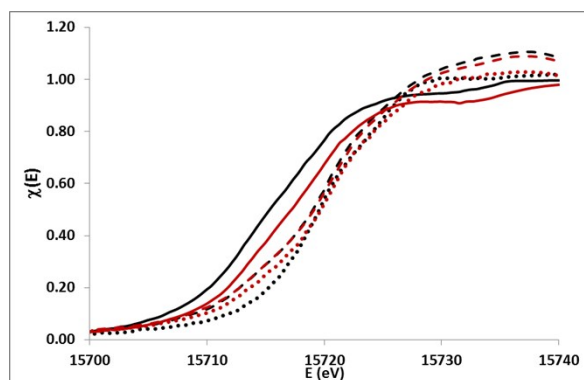

**Figure S2.** XANES BiL<sub>2</sub> spectra of synthesis suspension in red at various times as indicated: time 0 (dashed line), 1 hour (dotted line), 14 days (solid line). Reference powder spectra are in black as indicated: Bi<sub>2</sub>O<sub>3</sub> (dashed line), BiCl<sub>3</sub> (dotted line), Bi metal (solid line).

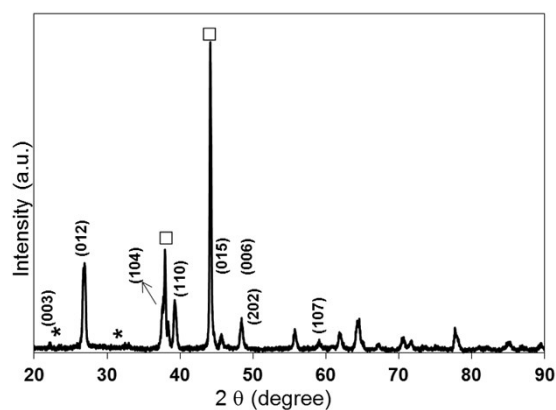

**Figure S3.** XRD pattern of BiNP in Figure 4 (c). Peak assignments are shown according to the rhombohedral structure of Bi metal. The asterix indicate the positions of much smaller BiO<sub>x</sub> peaks while the squares indicate peaks associated with the aluminum holder.

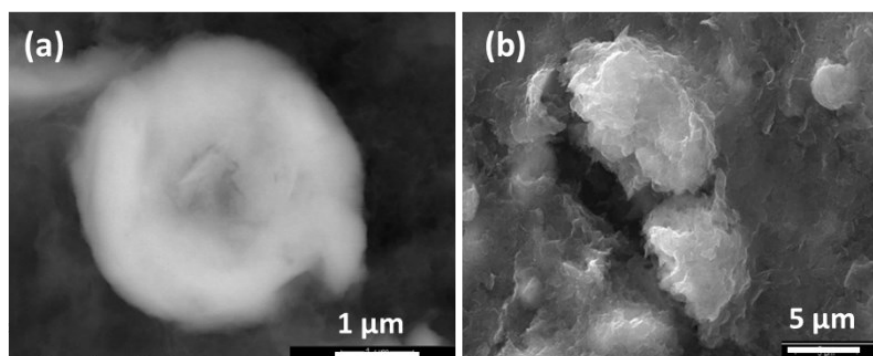

**Figure S4.** (a) Magnified SEM image of a typical Bi cluster observed with 4 layers. (b) Magnified SEM image of a white cluster formed on the 20 layer sample in Figure 5(d). The cluster area contains more than 6 times the amount of Bi as the interstitial space (as determined using EDS) .

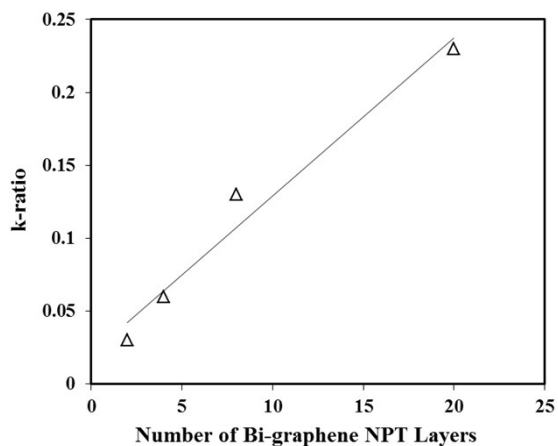

**Figure S5.** EDS k-ratio for Bi ( $I_{\text{coating}}/I_{\text{Bi metal}}$ ) with respect to the number of deposited layers.

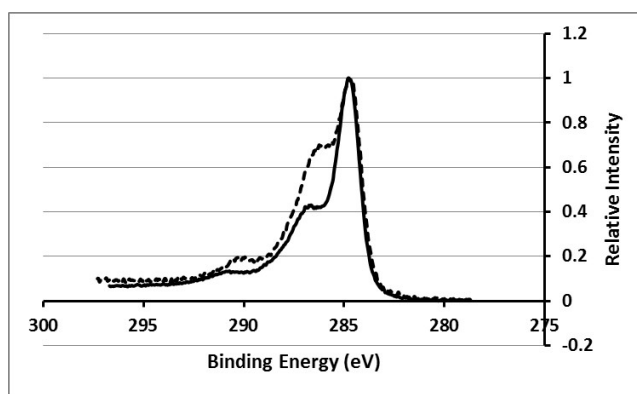

**Figure S6.** X-ray photoelectron spectrum of the C1s binding energy region for the dried GNP (solid) and mixed BiNP-GNP (dashed) suspensions. Counts for each curve are normalized to the most prominent adventitious (C-C) carbon peak at 284.8 eV. A secondary peak appears at ~289 eV indicating the presence of an oxidized surface species (C-O).

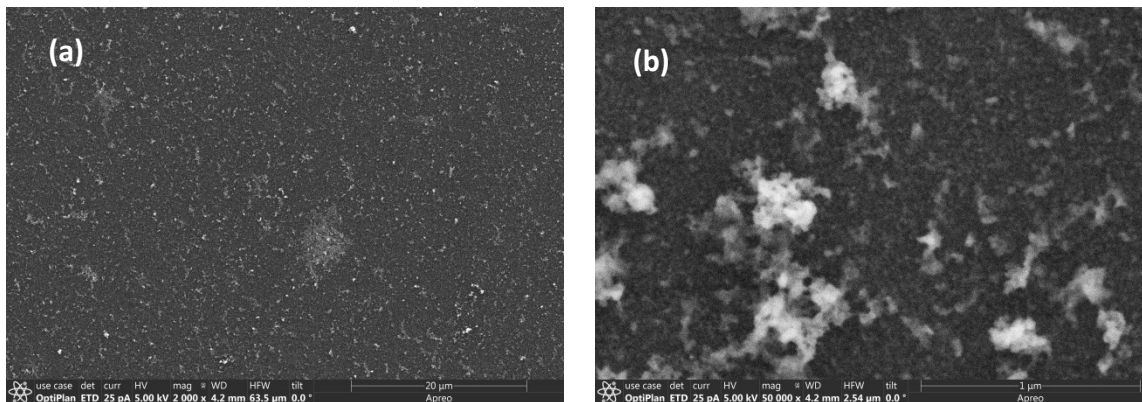

**Figure S7.** (a) SEM image of the surface. (b) Magnified SEM image of the surface.

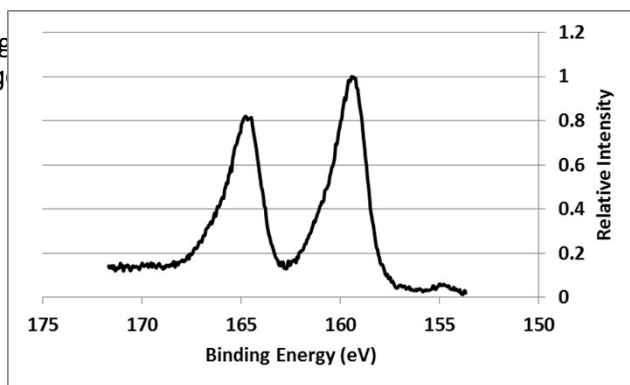

ded at 1000x magnification.

**Figure S8.** X-ray photoelectron spectrum of the Bi4F binding energy region of the 8 layer BiNP LbL assembly. No metallic Bi is observed.

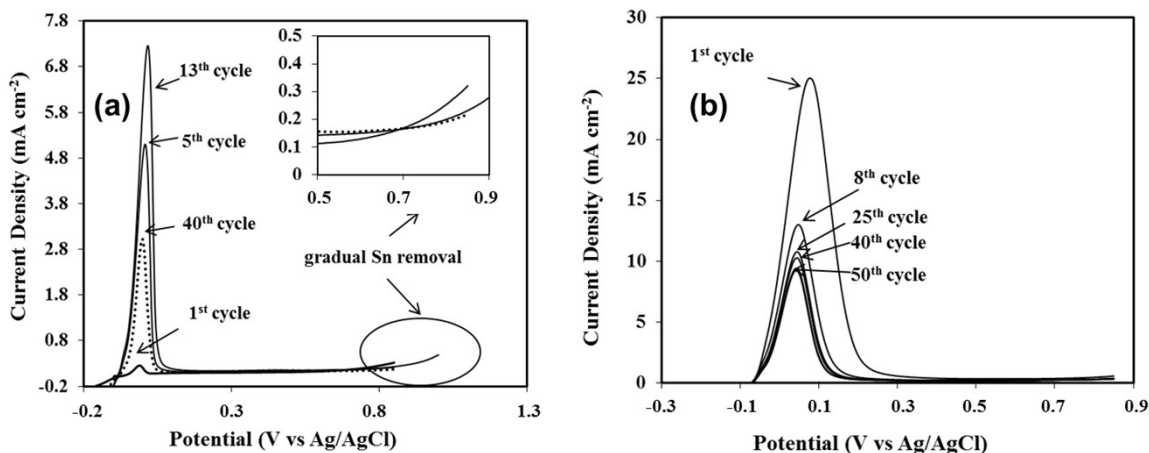

**Figure S9.** LSV showing the impact of a 4 layer mixed BiNP-GNP assembly on the potential region where Sn removal occurs.

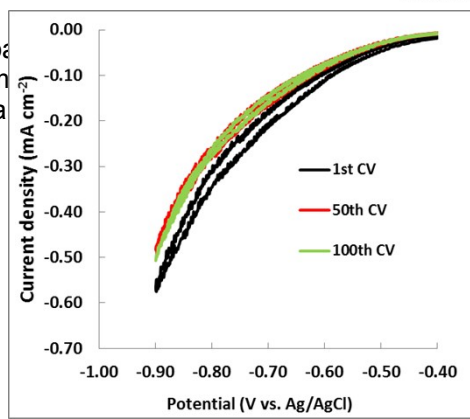

1 M H<sub>2</sub>SO<sub>4</sub> on Bi peak intensity for 100 cycles (the inset expands the potential region from 0.5 to 0.9 V in 5 M NaOH. Scan rate of 50 mV s<sup>-1</sup>.

**Figure S10.** The initial, 50<sup>th</sup>, and 100<sup>th</sup> consecutive CV's of 8 layers of BiNP-GNP deposited on a GC electrode in 2 M H<sub>2</sub>SO<sub>4</sub>. The sweep rate was 20 mV/s.

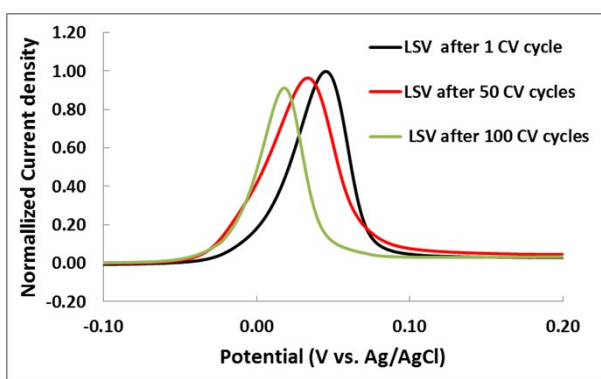

**Figure S11.** LSV in the Bi stripping region of the samples subjected to CV cycling as in Figure S10. Normalized current density depicts relative loss in Bi content.

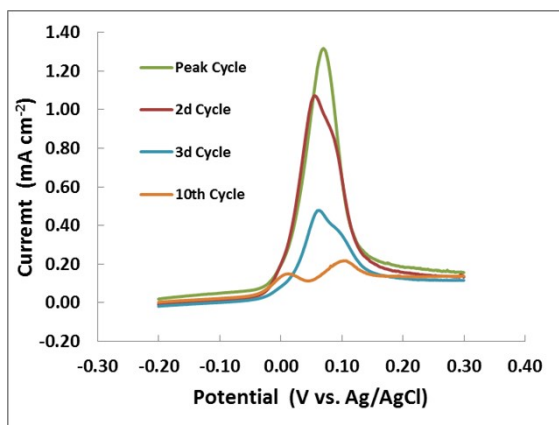

**Figure S12.** LSV showing the impact of repeated potential sweeps in 0.5 M H<sub>2</sub>SO<sub>4</sub> on Bi peak intensity for an 8 layer BiNP assembly after 1 min wash in 0.25 M NaOH. Scan rate of 50 mV s<sup>-1</sup>.

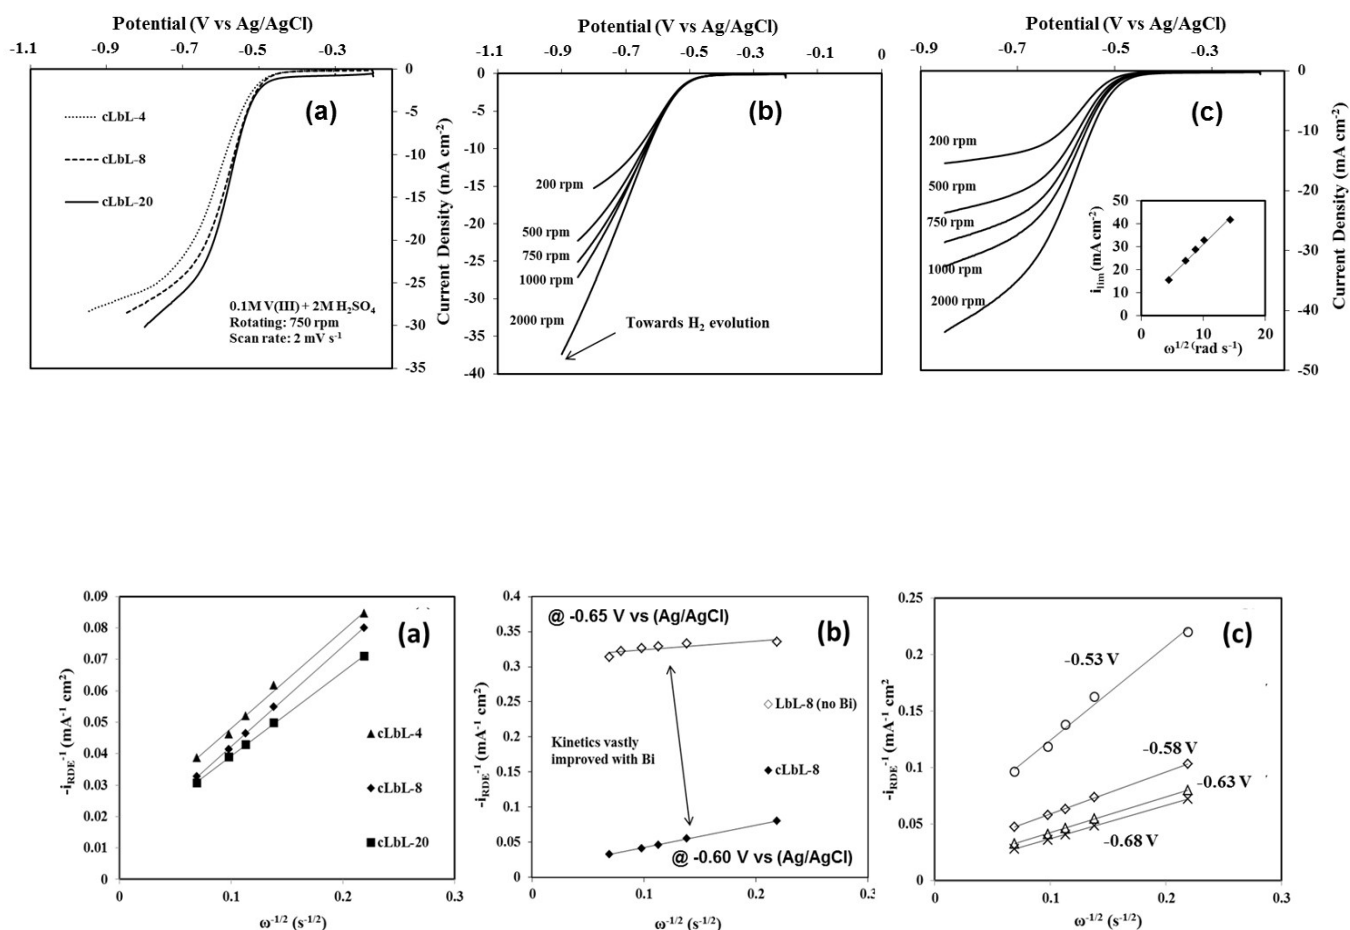

**Figure S14.** (a) Koutecky-Levich plots obtained from hydrodynamic voltammograms for 4, 8, and 20 layers of mixed BiNP-GNP at  $-0.6\ V$  (vs Ag/AgCl), (b) comparison of K-L analysis for 8 assembled layers with Bi (at  $-0.6\ V$  vs. Ag/AgCl) and without Bi (at  $-0.65\ V$  vs Ag/AgCl), as labeled, and (c) K-L plots of 8 layers of mixed BiNP-GNP obtained at different potentials. All in  $N_2$ -saturated  $0.1M V(III) + 2M H_2SO_4$  solution.

**Table S1. Elemental Data of BiNP from EDS**

| Sample       | Weight % |     |      |     |
|--------------|----------|-----|------|-----|
|              | Bi       | O   | Sn   | Cl  |
| water washed | 41.2     | 6.4 | 43.3 | 9.1 |



|                                      |      |     |     |     |
|--------------------------------------|------|-----|-----|-----|
| 7.5 M HCl<br>immersion for 5<br>min. | 92.3 | 6.2 | 0.2 | 1.3 |
|--------------------------------------|------|-----|-----|-----|
